# Supplementary material
Source: PubMed Central journal article supplement (PMC8855780)
Supplement: ccm-50-e253-s001.pdf [file ccm-50-e253-s001.pdf]

**Supplemental Table 1: ICD-10 codes indicating symptomatic disease**

| <b>ICD10 code</b> | <b>Diagnosis name</b>                                            |
|-------------------|------------------------------------------------------------------|
| A41.89            | Other specified sepsis                                           |
| A41.9             | Sepsis, unspecified organism                                     |
| B97.89            | Other viral agents as the cause of diseases classified elsewhere |
| D72.810           | Lymphocytopenia                                                  |
| E84.9             | Cystic fibrosis, unspecified                                     |
| E86.0             | Dehydration                                                      |
| E86.9             | Volume depletion, unspecified                                    |
| E87.1             | Hypo-osmolality and hyponatremia                                 |
| E87.2             | Acidosis                                                         |
| I95.9             | Hypotension, unspecified                                         |
| J12.81            | Pneumonia due to SARS-associated coronavirus                     |
| J12.89            | Other viral pneumonia                                            |
| J12.9             | Viral pneumonia, unspecified                                     |
| J15.9             | Unspecified bacterial pneumonia                                  |
| J16.8             | Pneumonia due to other specified infectious organisms            |
| J18.1             | Lobar pneumonia, unspecified organism                            |
| J18.9             | Pneumonia, unspecified organism                                  |
| J22               | Unspecified acute lower respiratory infection                    |
| J80               | Acute respiratory distress syndrome                              |
| J95.851           | Ventilator associated pneumonia                                  |
| J96.01            | Acute respiratory failure with hypoxia                           |
| J96.21            | Acute and chronic respiratory failure with hypoxia               |
| J96.91            | Respiratory failure, unspecified with hypoxia                    |
| J98.8             | Other specified respiratory disorders                            |
| J98.9             | Respiratory disorder, unspecified                                |
| R00.0             | Tachycardia, unspecified                                         |
| R05               | Cough                                                            |
| R06.02            | Shortness of breath                                              |
| R06.03            | Acute respiratory distress                                       |
| R09.02            | Hypoxemia                                                        |
| R19.7             | Diarrhea, unspecified                                            |
| R41.82            | Altered mental status, unspecified                               |
| R50.81            | Fever presenting with conditions classified elsewhere            |
| R50.9             | Fever, unspecified                                               |
| R53.1             | Weakness                                                         |
| R55               | Syncope and collapse                                             |
| R57.9             | Shock, unspecified                                               |
| R65.20            | Severe sepsis without septic shock                               |
| R65.21            | Severe sepsis with septic shock                                  |
| T86.812           | Lung transplant infection                                        |
| Z51.5             | Encounter for palliative care                                    |
| Z99.11            | Dependence on respirator (ventilator) status                     |
| Z99.81            | Dependence on supplemental oxygen                                |

A. Academic hospitals

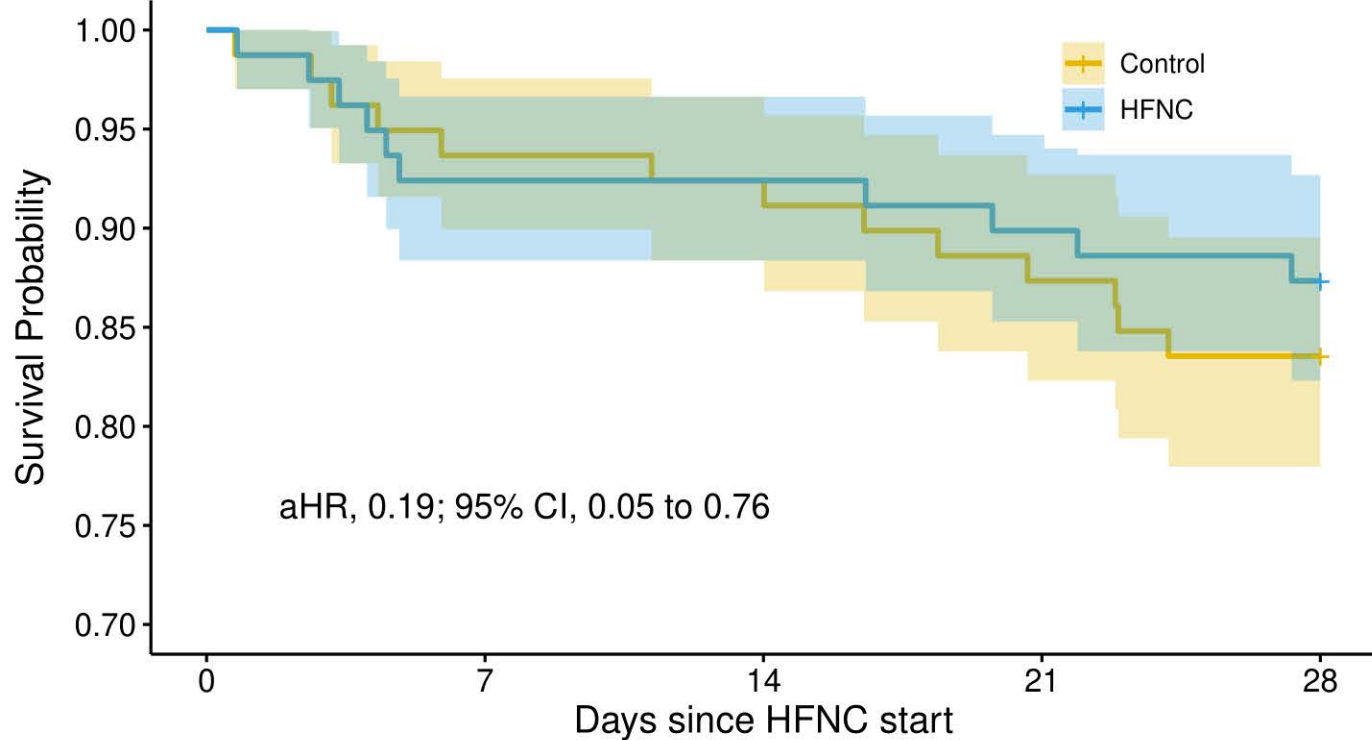

Number at risk

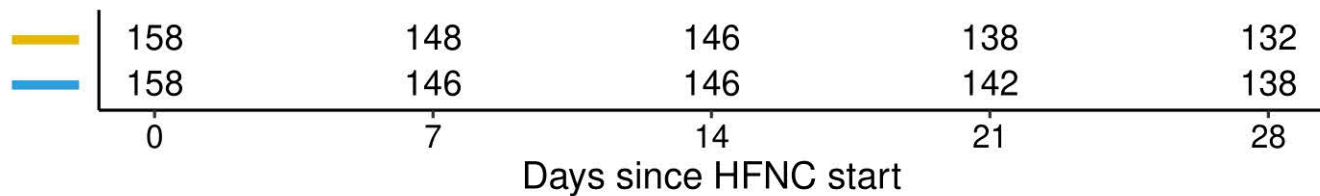

B. Community hospitals

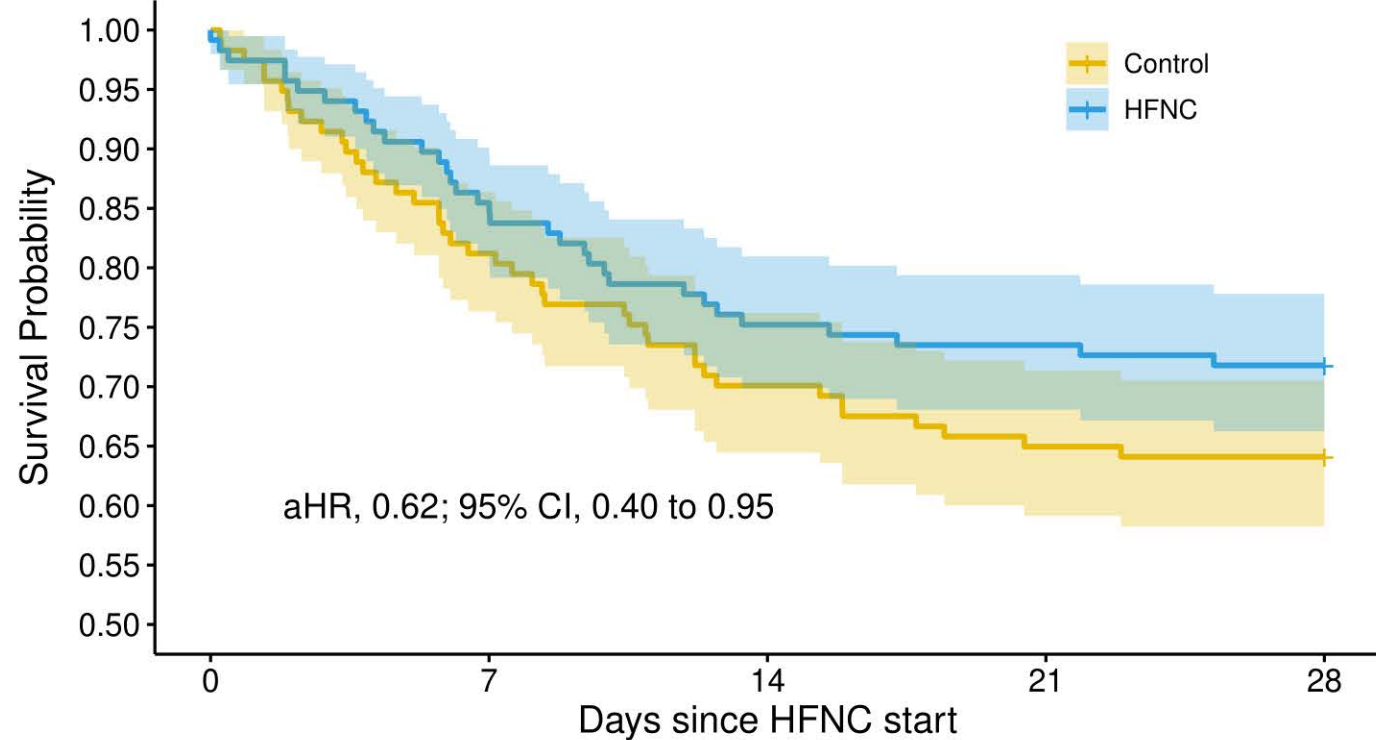

Number at risk

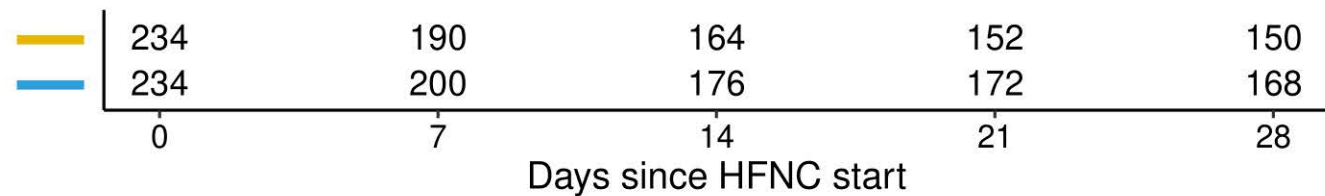

**Supplemental Figure Legends**

Supplemental Figure 1: Time to death stratified by hospital type

The Johns Hopkins Health System (JHHS) includes two academic hospitals (Johns Hopkins Hospital and Bayview Medical Center) and three community hospitals (Howard County General Hospital, Suburban Hospital, Sibley Memorial Hospital). aHR = adjusted hazard ratio; CI = confidence interval, HFNC = High-flow nasal cannula.

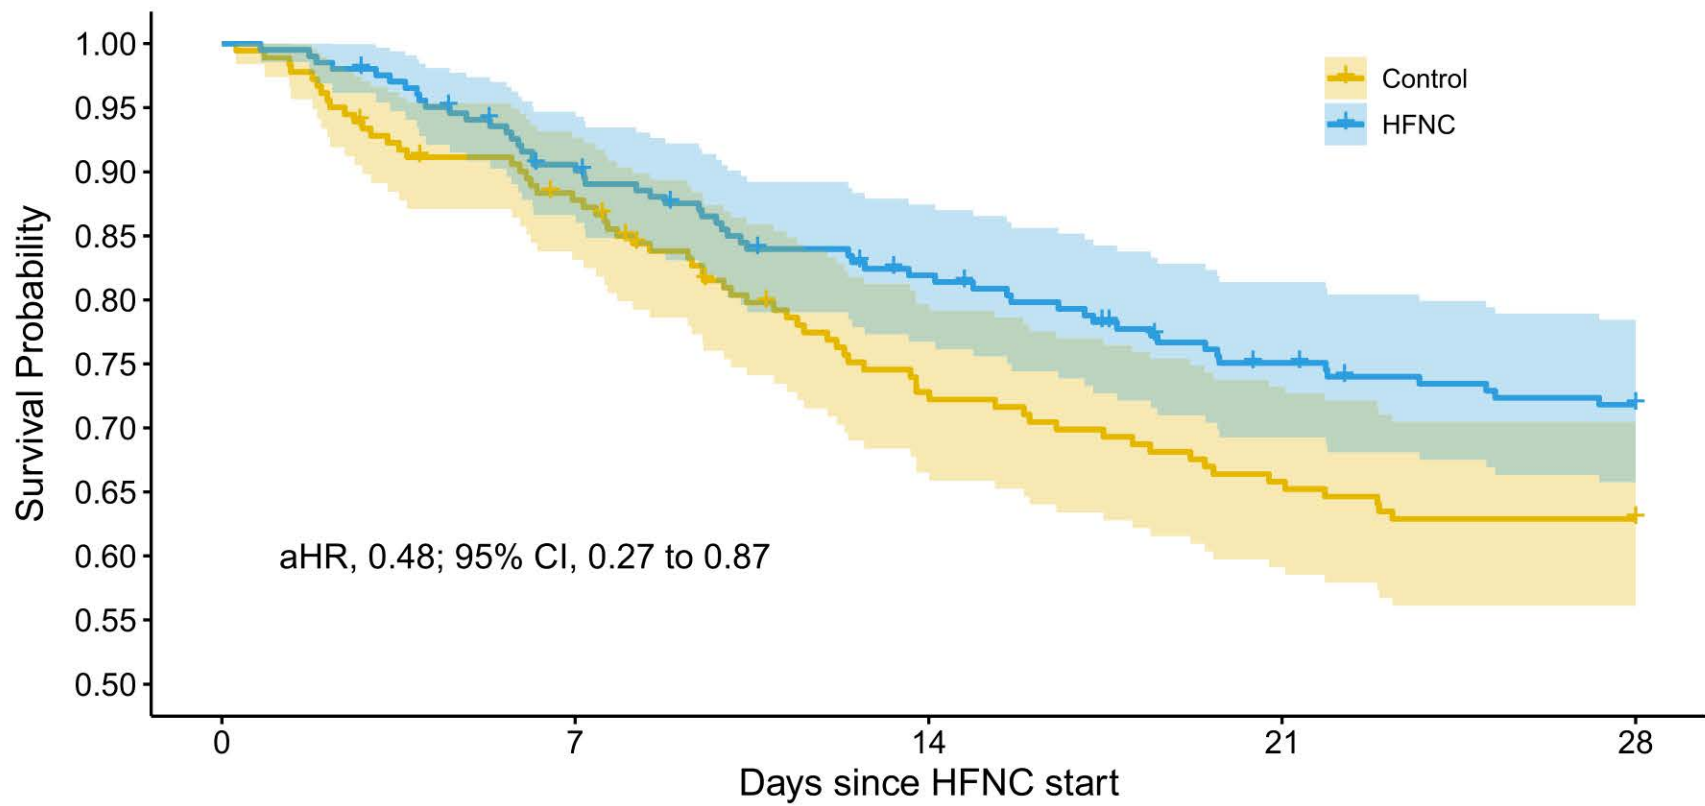

Number at risk

| Days since HFNC start | 0   | 7   | 14  | 21  | 28  |
|-----------------------|-----|-----|-----|-----|-----|
| Control (Yellow)      | 181 | 156 | 125 | 113 | 108 |
| HFNC (Blue)           | 203 | 180 | 158 | 140 | 132 |

## HIGH-FLOW NASAL CANNULA IN COVID-19 PNEUMONIA

Supplemental Figure 2: Time to death in patients who progressed to invasive mechanical ventilation (IMV)

To explore the effect of HFNC in the subset of patients who progressed to IMV, a hazard ratio for death was calculated for these patients compared to their matched controls. aHR = adjusted hazard ratio; CI = confidence interval, HFNC = High-flow nasal cannula, IMV = invasive mechanical ventilation.

A. Survival curve including patients who died within 24 hours

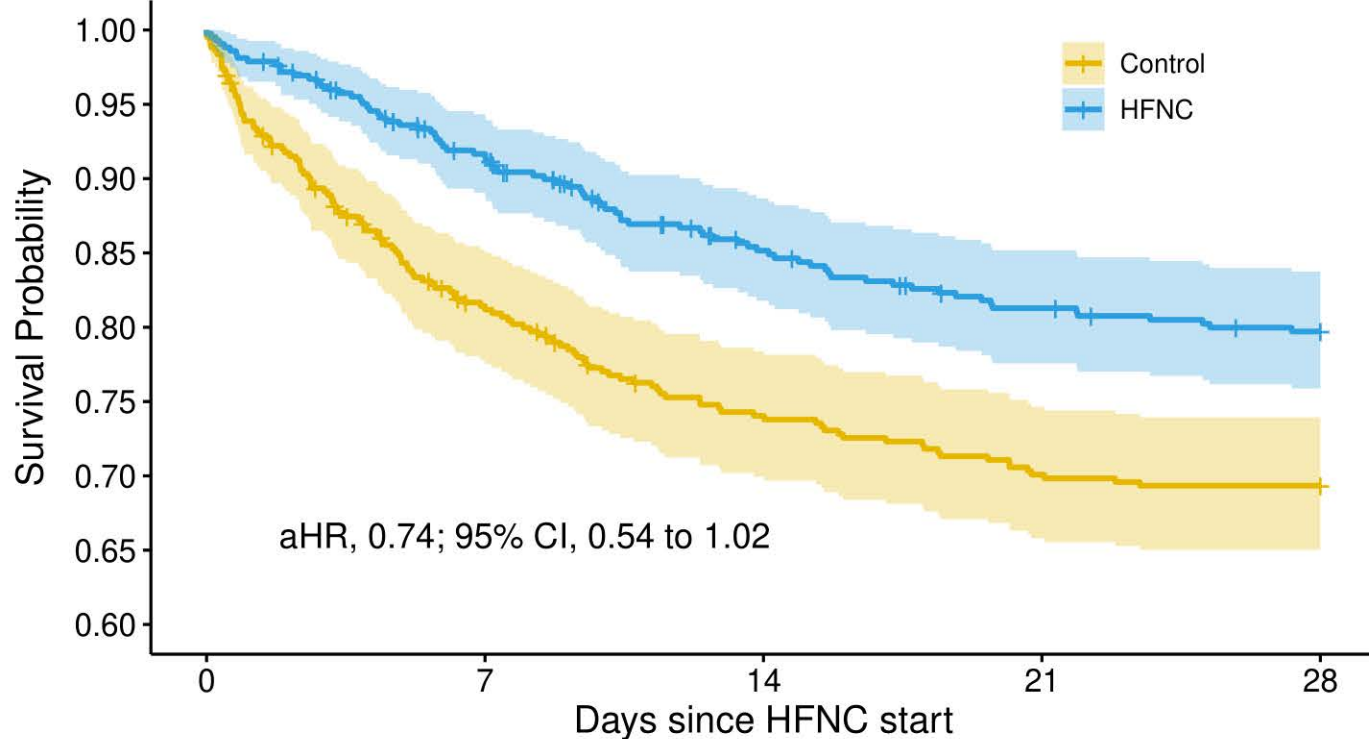

Number at risk

|         |     |     |     |     |     |
|---------|-----|-----|-----|-----|-----|
| Control | 425 | 333 | 299 | 283 | 280 |
| HFNC    | 425 | 377 | 332 | 313 | 304 |
|         | 0   | 7   | 14  | 21  | 28  |

Days since HFNC start

B. Cumulative discharge curve including patients who died within 24 hours

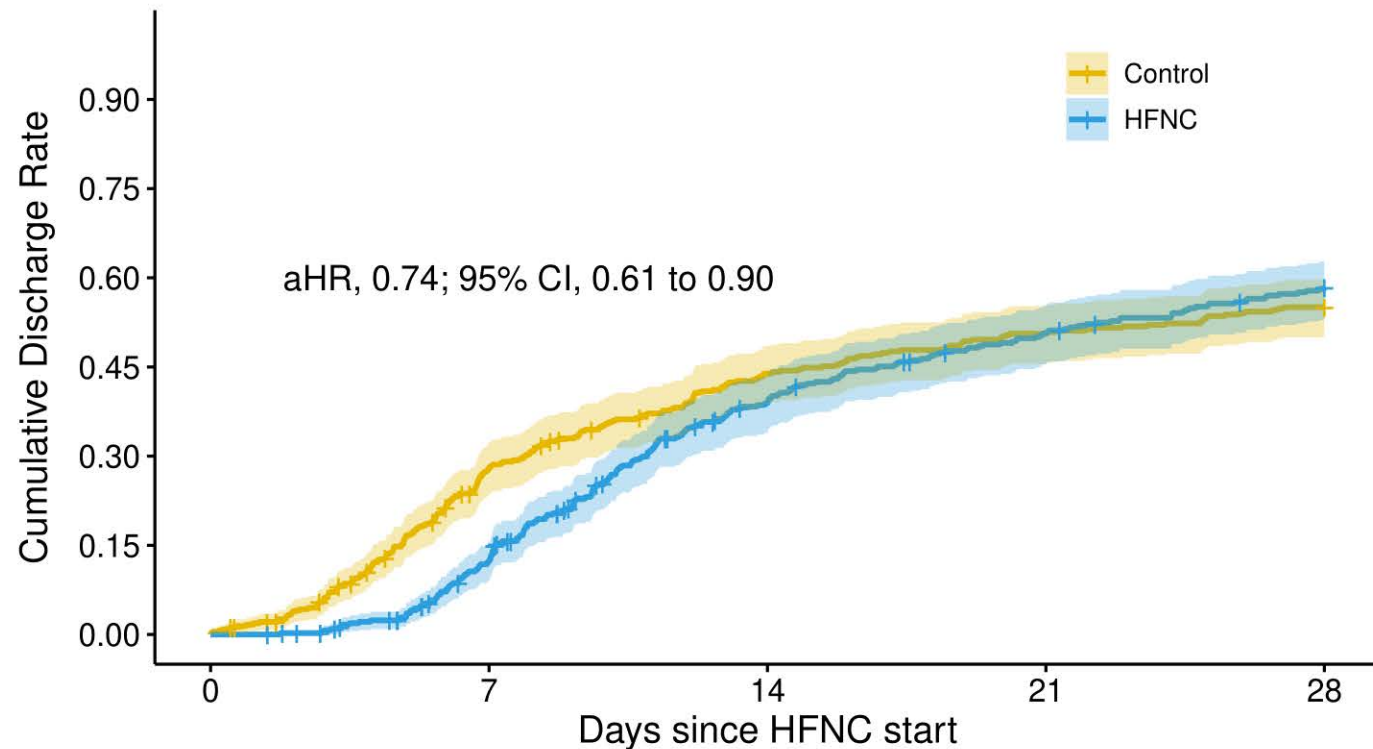

Number at risk

|         |     |     |     |     |     |
|---------|-----|-----|-----|-----|-----|
| Control | 425 | 295 | 226 | 199 | 181 |
| HFNC    | 425 | 361 | 235 | 187 | 155 |
|         | 0   | 7   | 14  | 21  | 28  |

Days since HFNC start

## HIGH-FLOW NASAL CANNULA IN COVID-19 PNEUMONIA

Supplemental Figure 3: Time to death and discharge with inclusion of patients who died within 24 hours

To assess for selection or other biases, the time to death analysis was re-run without excluding patients who died within 24 hours of time of matching.

A. Academic hospitals

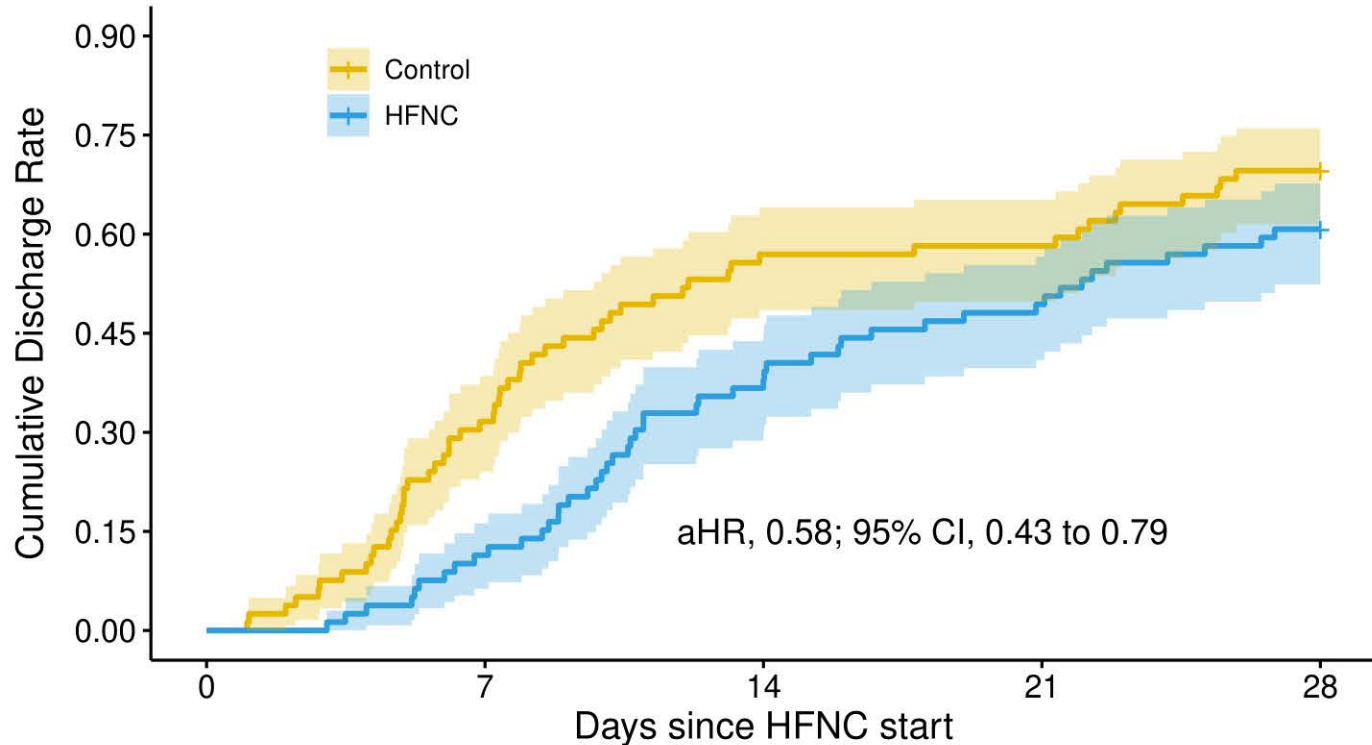

Number at risk

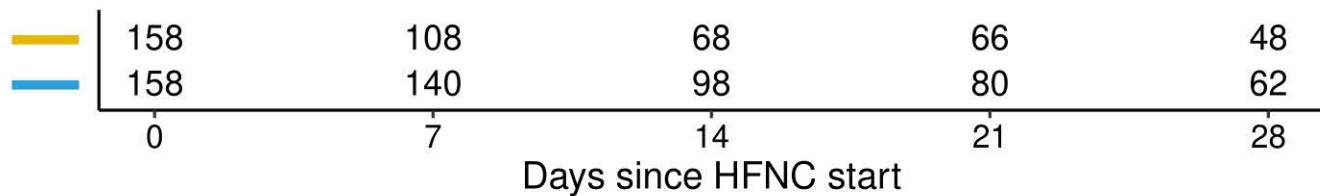

B. Community hospitals

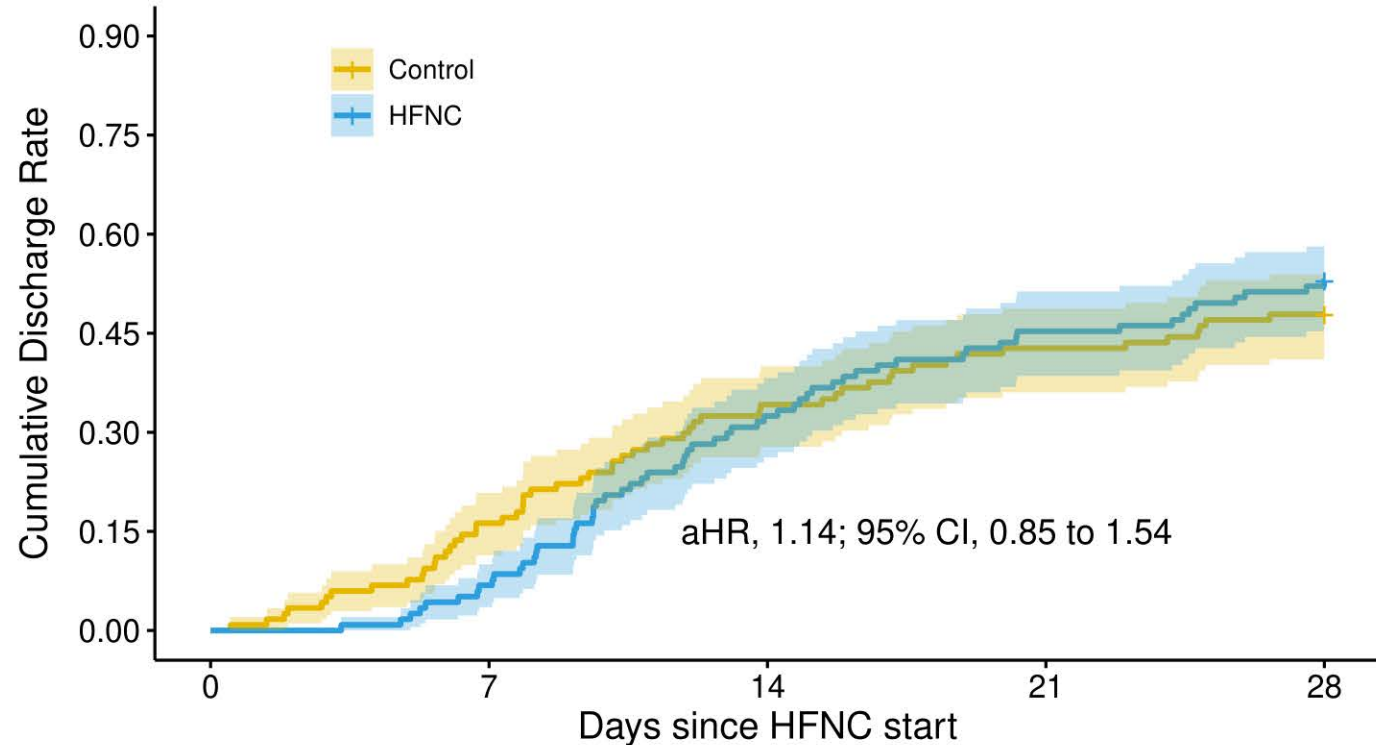

Number at risk

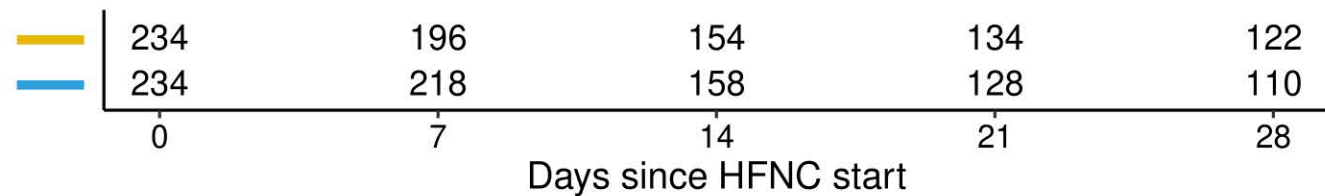



## HIGH-FLOW NASAL CANNULA IN COVID-19 PNEUMONIA

### Supplemental Figure 4: Time to discharge stratified by hospital type

The Johns Hopkins Health System (JHHS) includes two academic hospitals (Johns Hopkins Hospital and Bayview Medical Center) and three community hospitals (Howard County General Hospital, Suburban Hospital, Sibley Memorial Hospital). aHR = adjusted hazard ratio, CI = confidence interval, HFNC = High-flow nasal cannula.

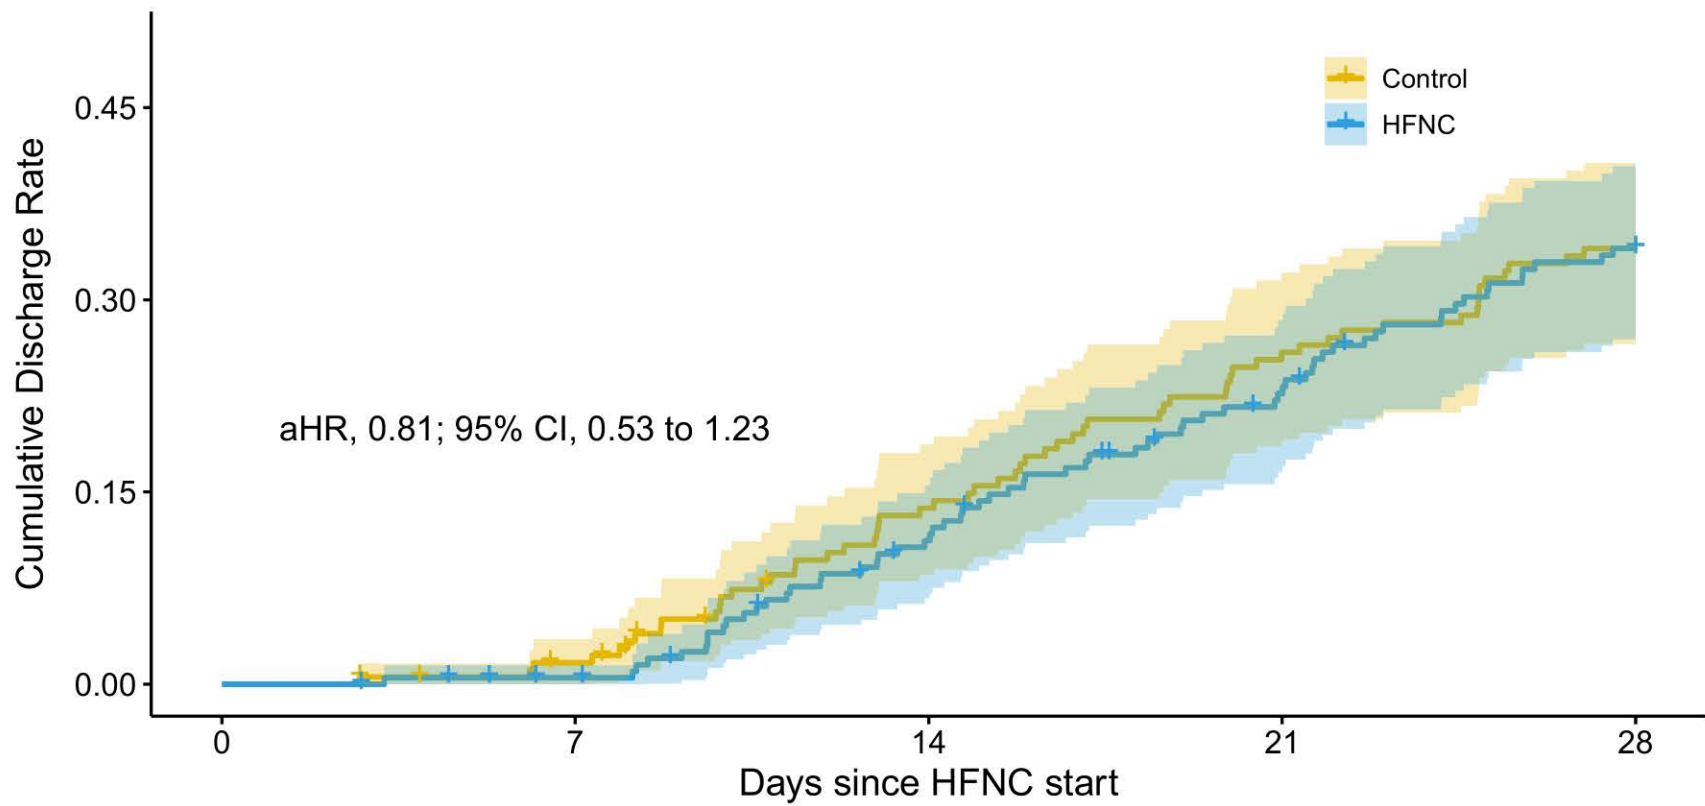

Number at risk

| Days since HFNC start | 0   | 7   | 14  | 21  | 28  |
|-----------------------|-----|-----|-----|-----|-----|
| Control (Yellow)      | 181 | 175 | 149 | 128 | 114 |
| HFNC (Blue)           | 203 | 198 | 172 | 145 | 122 |

## HIGH-FLOW NASAL CANNULA IN COVID-19 PNEUMONIA

Supplemental Figure 5: Time to discharge analysis of patients who progressed to invasive mechanical ventilation (IMV)

To explore the effect of HFNC in patients who progressed to IMV, a hazard ratio for time to discharge was calculated for these patients compared to their matched controls. aHR = adjusted hazard ratio, CI = confidence interval, HFNC = High-flow nasal cannula, IMV = invasive mechanical ventilation.

**A. 1-day prediction ROC curve**

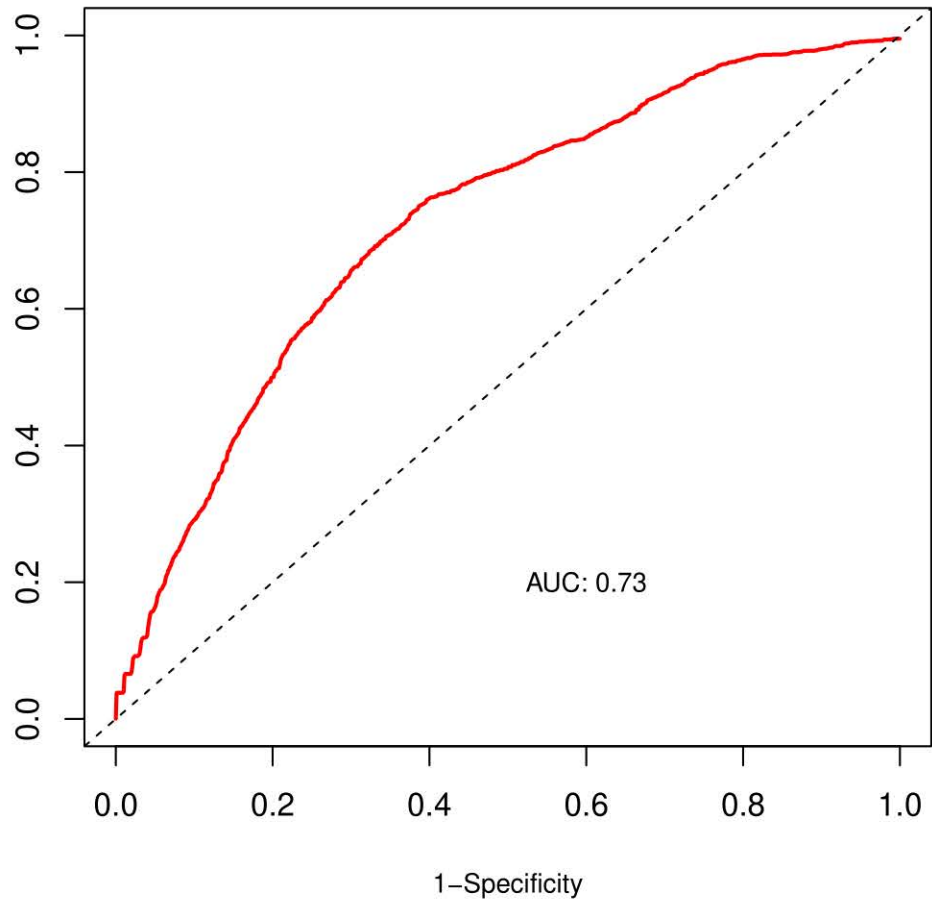

**B. 7-day prediction ROC curve**

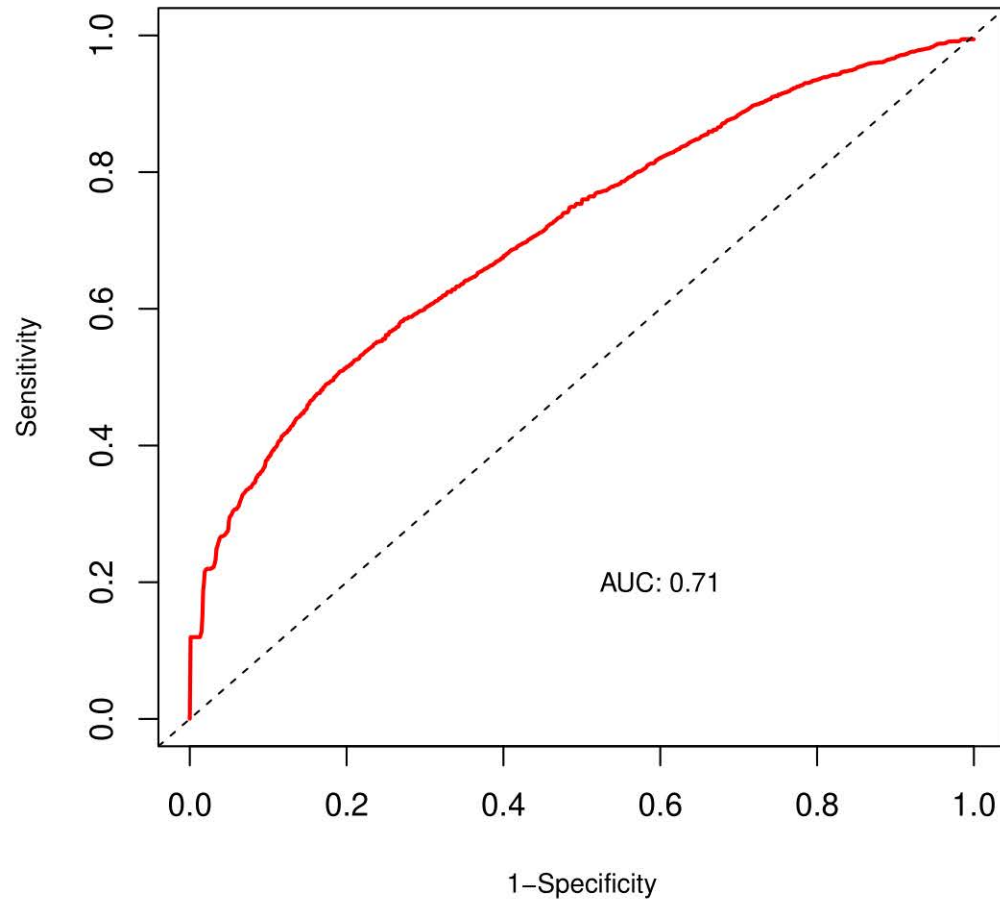

## HIGH-FLOW NASAL CANNULA IN COVID-19 PNEUMONIA

Supplemental Figure 6: Receiver operating characteristic (ROC) curves of model predicting ventilation or death.

ROC curves for a model predicting ventilation or death using ROX index as well as demographic, clinical, and laboratory variables. AUC = area under curve, ROC = receiving operator characteristic.

A. Survival curve for all matched patients

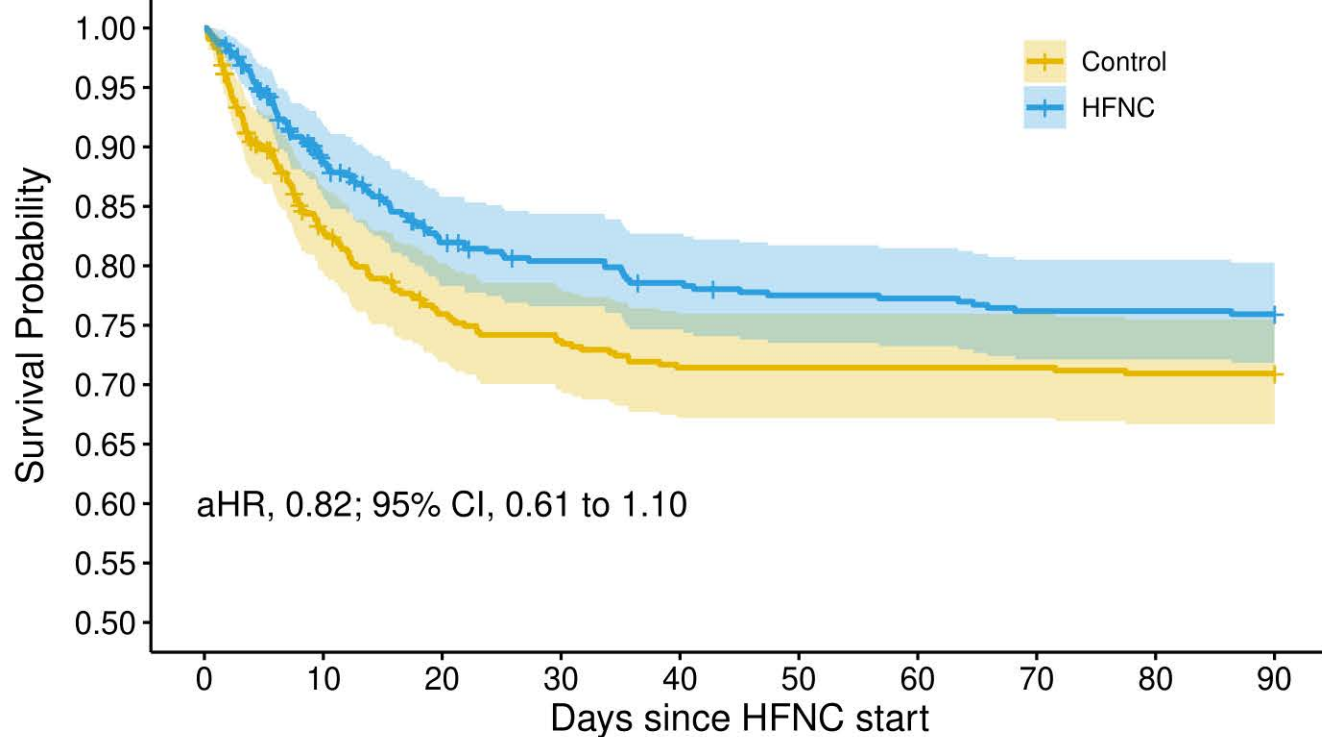

Number at risk

|         |     |     |     |     |     |     |     |     |     |     |
|---------|-----|-----|-----|-----|-----|-----|-----|-----|-----|-----|
| Control | 423 | 335 | 304 | 295 | 286 | 286 | 286 | 286 | 284 | 284 |
| HFNC    | 423 | 354 | 317 | 307 | 299 | 294 | 293 | 289 | 289 | 288 |
|         | 0   | 10  | 20  | 30  | 40  | 50  | 60  | 70  | 80  | 90  |

Days since HFNC start

B. Survival curve excluding patients intubated within 6 hours of admission

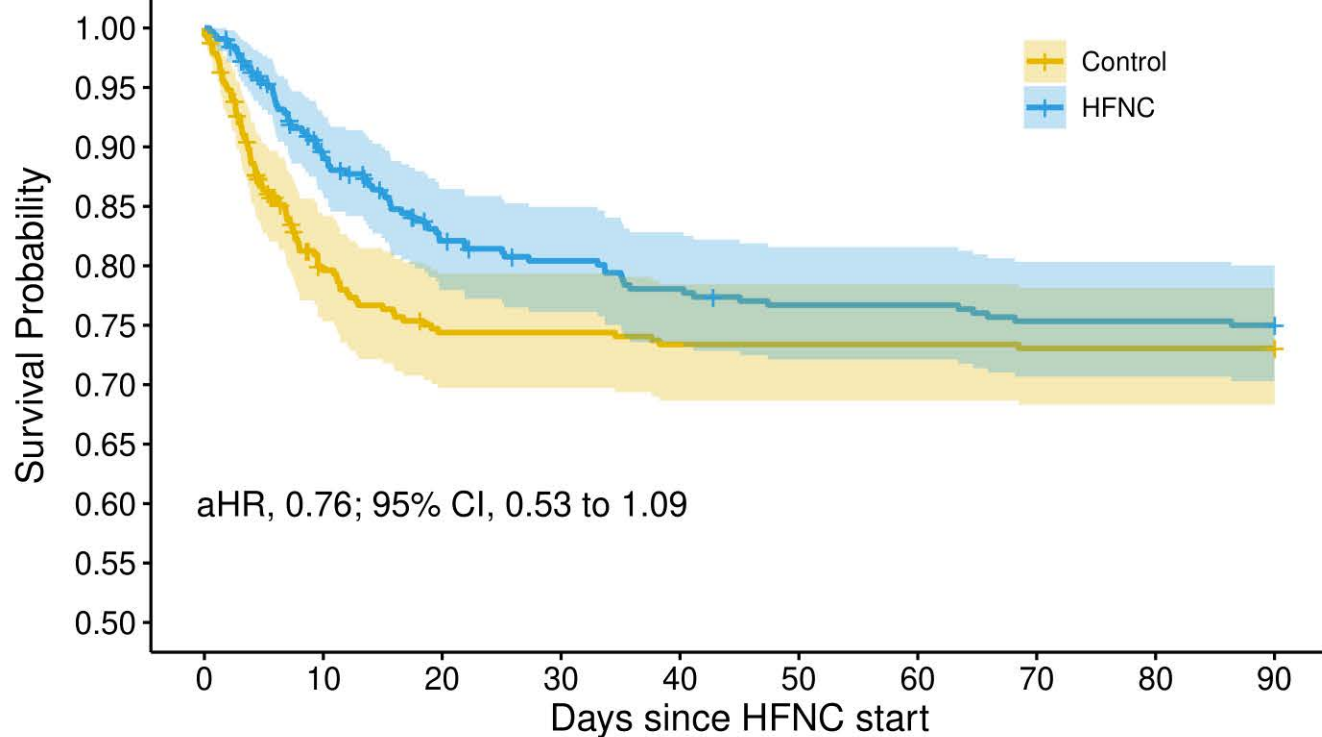

Number at risk

|         |     |     |     |     |     |     |     |     |     |     |
|---------|-----|-----|-----|-----|-----|-----|-----|-----|-----|-----|
| Control | 327 | 243 | 226 | 226 | 223 | 223 | 223 | 222 | 222 | 222 |
| HFNC    | 327 | 277 | 246 | 238 | 231 | 226 | 226 | 222 | 222 | 221 |
|         | 0   | 10  | 20  | 30  | 40  | 50  | 60  | 70  | 80  | 90  |

Days since HFNC start

## HIGH-FLOW NASAL CANNULA IN COVID-19 PNEUMONIA

### Supplemental Figure 7: Time to death in patients up to 90 days

To explore the effect of including the small number of deaths that occurred past 28 days, the primary analysis was re-run with censoring at 90 days. For the purpose of this analysis, the patients who were discharged before 90 days were right censored at 90 days. However, we did not have a way to verify that there were no deaths after discharge.
